# Supplementary material
Source: PubMed Central journal article supplement (PMC4913696)
Supplement: NIHMS794148-supplement-supporting_information.pdf [file NIHMS794148-supplement-supporting_information.pdf]

## **Supporting Information**

# Dye Sensitized Core/ Active Shell Upconversion Nanoparticles for Optogenetics and Bioimaging Applications

*Xiang Wu<sup>†,‡,§</sup>, Yuanwei Zhang<sup>†,§</sup>, Kendra Takle<sup>§,¶</sup>, Osman Bilse<sup>†</sup>, Zhanjun Li<sup>†</sup>,  
Hyungseok Lee<sup>†</sup>, Zijiao Zhang<sup>‡</sup>, Dongsheng Li<sup>#</sup>, Wei Fan<sup>±</sup>, Chunying Duan<sup>‡</sup>, Emory M.  
Chan<sup>||</sup>, Carlos Lois<sup>§</sup>, Yang Xiang<sup>§</sup>, Gang Han<sup>\*†</sup>*

<sup>†</sup> Department of Biochemistry and Molecular Pharmacology, University of Massachusetts Medical School, Worcester, Massachusetts 01605, United States.

<sup>§</sup> Neurobiology Department, University of Massachusetts Medical School, Worcester, Massachusetts 01605, United States.

<sup>‡</sup> State Key Laboratory of Fine Chemicals, Dalian University of Technology, Dalian, 116012, People's Republic of China.

<sup>||</sup> The Molecular Foundry, Lawrence Berkeley National Laboratory, Berkeley, California 94720, United States

<sup>‡</sup> Department of Materials Science & Engineering, Zhejiang University, Hangzhou, 310027, China.

<sup>#</sup> Materials Sciences, Physical and Computational Sciences Directorate, Pacific Northwest National Laboratory, Richland, Washington 99352, United States

<sup>±</sup> Chemical Engineering Department, University of Massachusetts, Amherst, Massachusetts 01003, United States

## Spectroscopic and Transmission Electron Microscopy

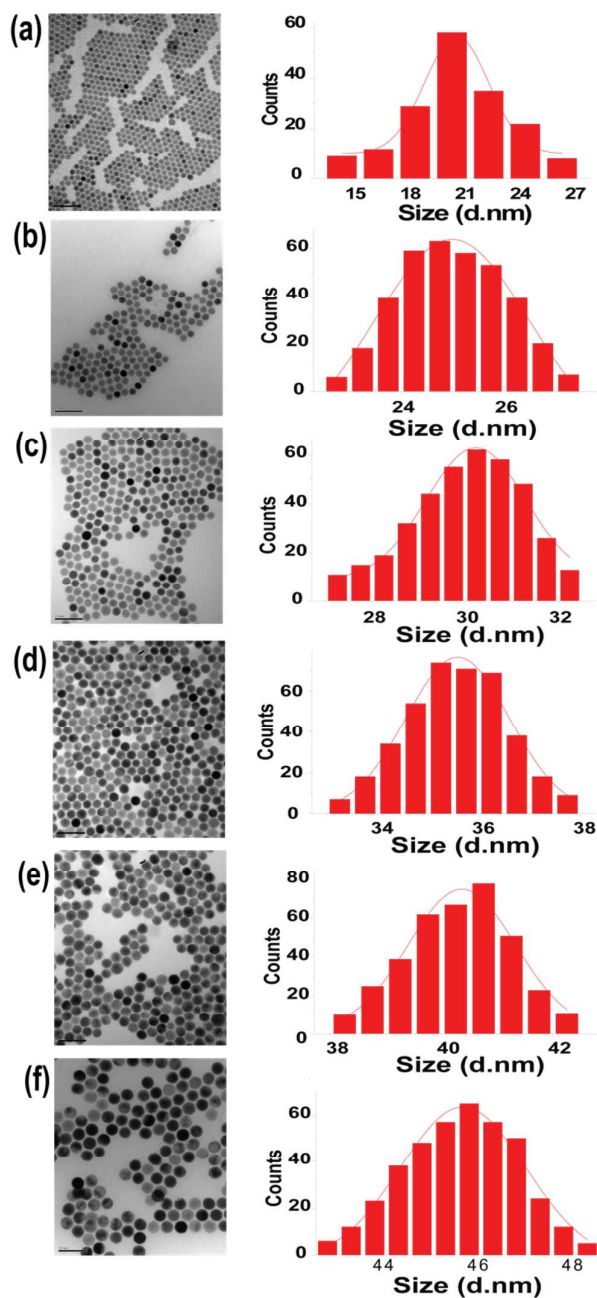

**Figure S1.** TEM images (left) and their corresponding size distributions (right) of (a)  $\beta$ -NaYF<sub>4</sub>:20%Yb, 2%Er with the size  $20.3 \pm 1.6$  nm, (b)  $\beta$ -NaYF<sub>4</sub>:20%Yb, 2%Er@ $\beta$ -NaYF<sub>4</sub> with the size  $24.9 \pm 1.5$  nm, (c)  $\beta$ -NaYF<sub>4</sub>:20%Yb, 2%Er@ $\beta$ -NaYF<sub>4</sub> with the size  $30.2 \pm 1.5$  nm, (d)  $\beta$ -NaYF<sub>4</sub>:20%Yb, 2%Er@ $\beta$ -NaYF<sub>4</sub> with the size  $35.5 \pm 1.2$  nm, (e)  $\beta$ -NaYF<sub>4</sub>:20%Yb, 2%Er@ $\beta$ -NaYF<sub>4</sub> with the size  $40.4 \pm 1.1$  nm, (f)  $\beta$ -NaYF<sub>4</sub>:20%Yb, 2%Er@ $\beta$ -NaYF<sub>4</sub> with the size  $45.6 \pm 1.5$  nm. Scale bar: 100 nm.

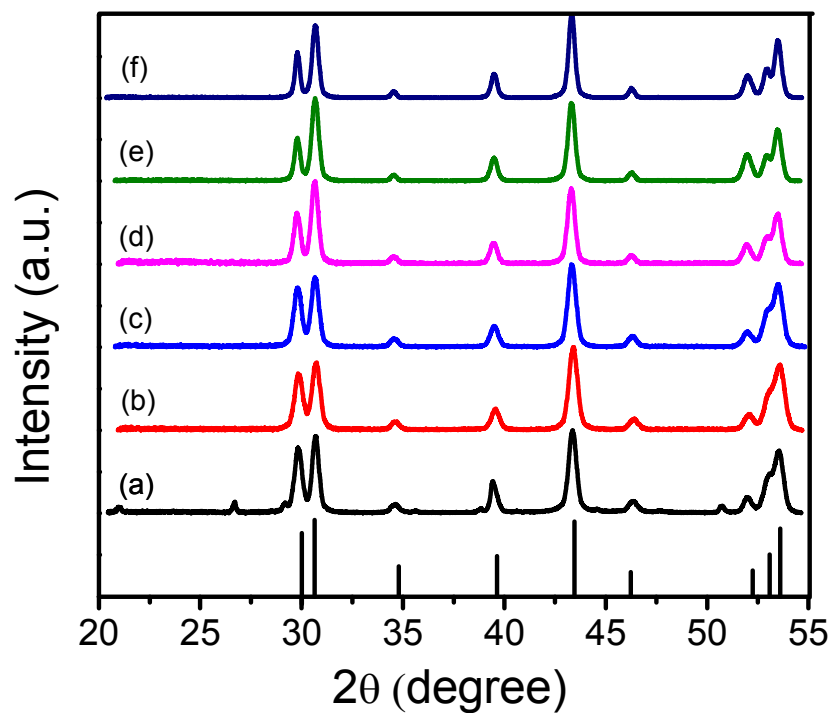

**Figure S2.** XRD patterns of (a)  $\beta$ -NaYF<sub>4</sub>:20%Yb, 2%Er with the size  $20.3 \pm 1.6$  nm, (b)  $\beta$ -NaYF<sub>4</sub>:20%Yb, 2%Er@ $\beta$ -NaYF<sub>4</sub> with the size  $24.9 \pm 1.5$  nm, (c)  $\beta$ -NaYF<sub>4</sub>:20%Yb, 2%Er@ $\beta$ -NaYF<sub>4</sub> with the size  $30.2 \pm 1.5$  nm, (d)  $\beta$ -NaYF<sub>4</sub>:20%Yb, 2%Er@ $\beta$ -NaYF<sub>4</sub> with the size  $35.5 \pm 1.2$  nm, (e)  $\beta$ -NaYF<sub>4</sub>:20%Yb, 2%Er@ $\beta$ -NaYF<sub>4</sub> with the size  $40.4 \pm 1.1$  nm, (f)  $\beta$ -NaYF<sub>4</sub>:20%Yb, 2%Er@ $\beta$ -NaYF<sub>4</sub> with the size  $45.6 \pm 1.5$  nm. The standard card of  $\beta$ -NaYF<sub>4</sub> (JCPDS: 16-0334) was given as a reference (bottom).

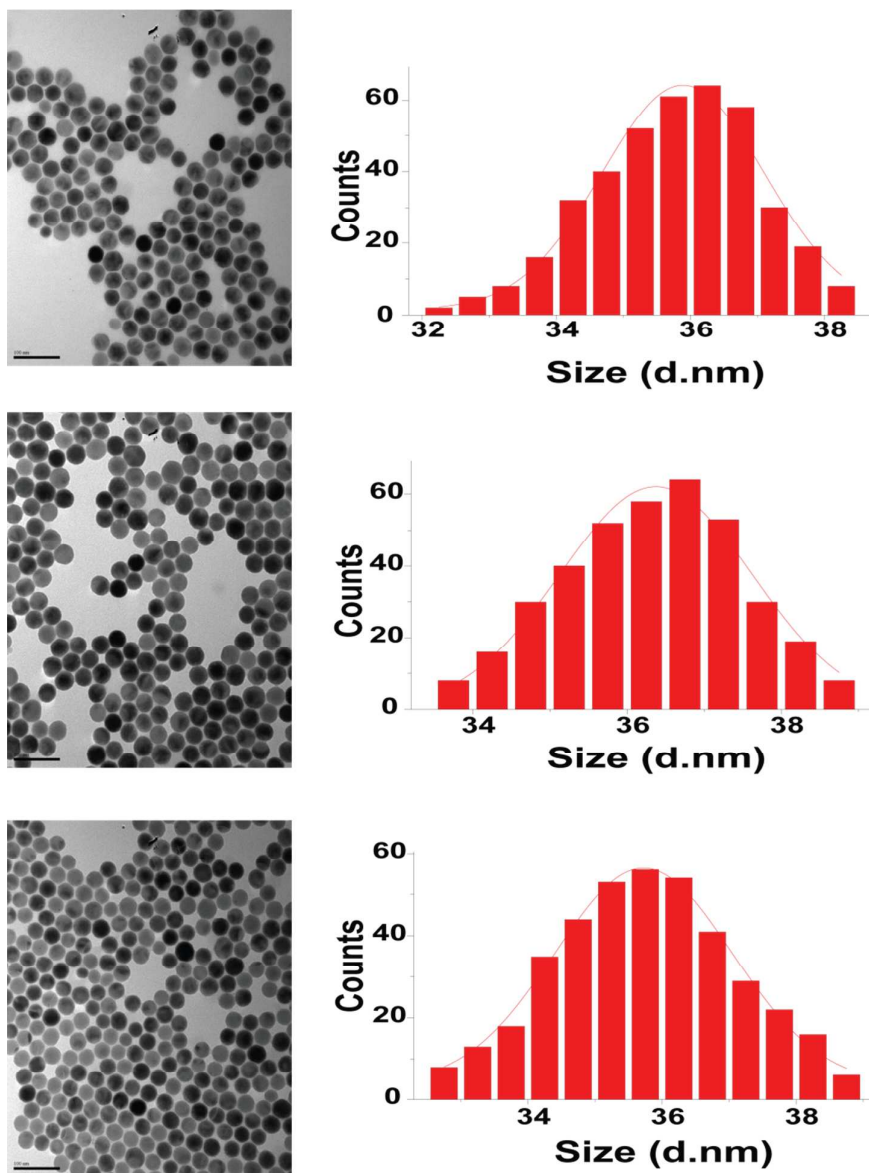

**Figure S3.** TEM images (left) and their corresponding size distributions (right) of (a)  $\beta\text{-NaYF}_4\text{:20\%Yb, 2\%Er@}\beta\text{-NaYF}_4\text{: 10\%Yb}$  with the size  $35.9 \pm 1.4$  nm, (b)  $\beta\text{-NaYF}_4\text{:20\%Yb, 2\%Er@}\beta\text{-NaYF}_4\text{: 30\%Yb}$  with the size  $36.4 \pm 1.2$  nm, (c)  $\beta\text{-NaYF}_4\text{:20\%Yb, 2\%Er@}\beta\text{-NaYF}_4\text{: 50\%Yb}$  UCNPs with the size  $35.7 \pm 1.6$  nm. Scale bar: 100 nm.

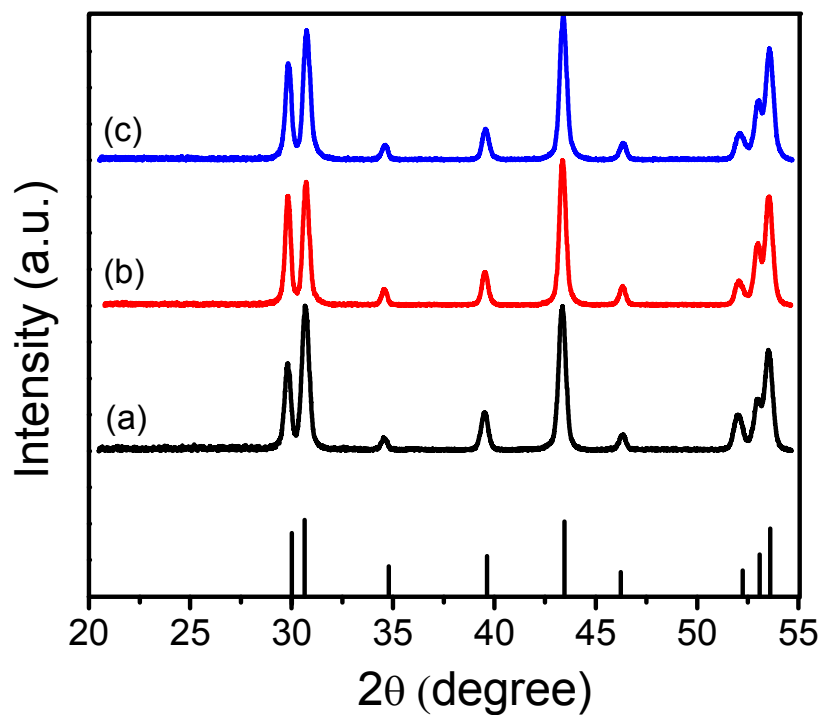

**Figure S4.** XRD patterns of (a)  $\beta$ -NaYF<sub>4</sub>:20%Yb, 2%Er@ $\beta$ -NaYF<sub>4</sub>: 10%Yb with the size  $35.9 \pm 1.4$  nm, (b)  $\beta$ -NaYF<sub>4</sub>:20%Yb, 2%Er@ $\beta$ -NaYF<sub>4</sub>: 30%Yb with the size  $36.4 \pm 1.2$  nm, (c)  $\beta$ -NaYF<sub>4</sub>:20%Yb, 2%Er@ $\beta$ -NaYF<sub>4</sub>: 50%Yb UCNPs with the size  $35.7 \pm 1.6$  nm. The standard card of  $\beta$ -NaYF<sub>4</sub> (JCPDS: 16-0334) was given as a reference (bottom).

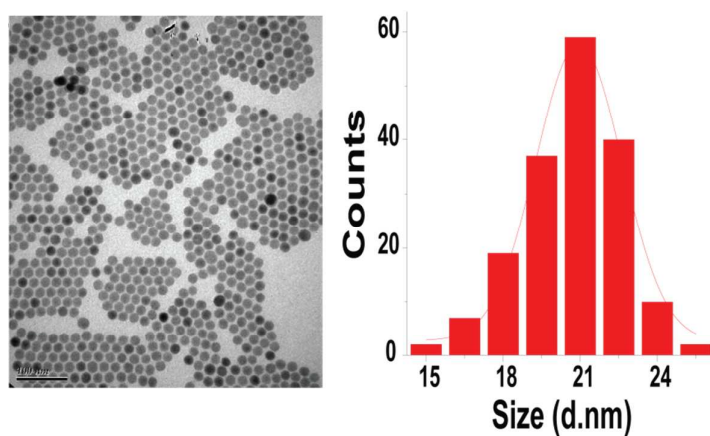

**Figure S5.** TEM images (left) and the corresponding size distribution (right) of  $\beta$ -NaYF<sub>4</sub>:30%Yb, 2%Er with the size  $20.9 \pm 1.4$  nm. Scale bar: 100 nm.

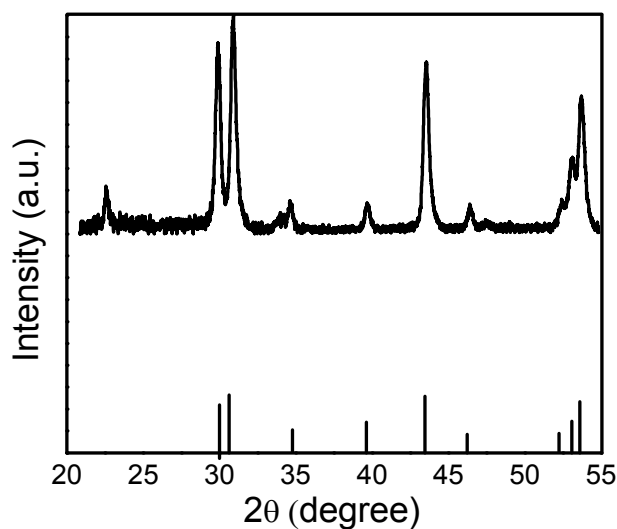

**Figure S6.** XRD pattern of  $\beta$ -NaYF<sub>4</sub>:30%Yb, 2%Er with the size  $20.9 \pm 1.4$  nm. The standard card of  $\beta$ -NaYF<sub>4</sub> (JCPDS: 16-0334) was given as a reference (bottom).

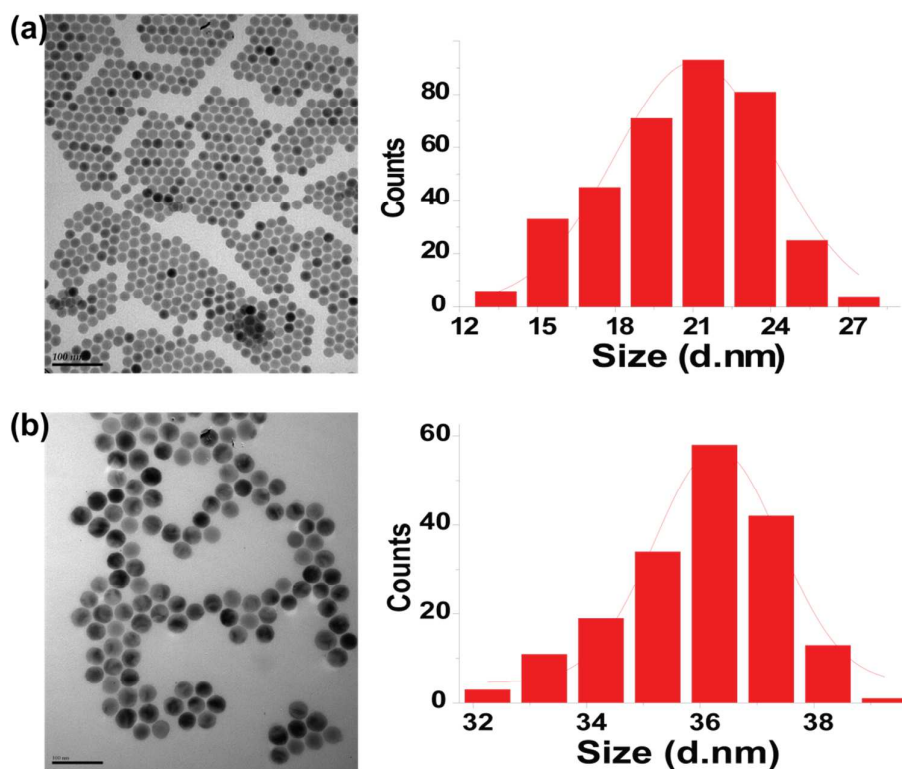

**Figure S7.** TEM images (left) and their corresponding size distributions (right) of (a)  $\beta$ -NaYF<sub>4</sub>: 20%Yb with the size  $21.0 \pm 1.1$  nm, (b)  $\beta$ -NaYF<sub>4</sub>: 20%Yb@ $\beta$ -NaYF<sub>4</sub>:10%Yb with the size  $36.2 \pm 1.4$  nm. Scale bar: 100 nm.

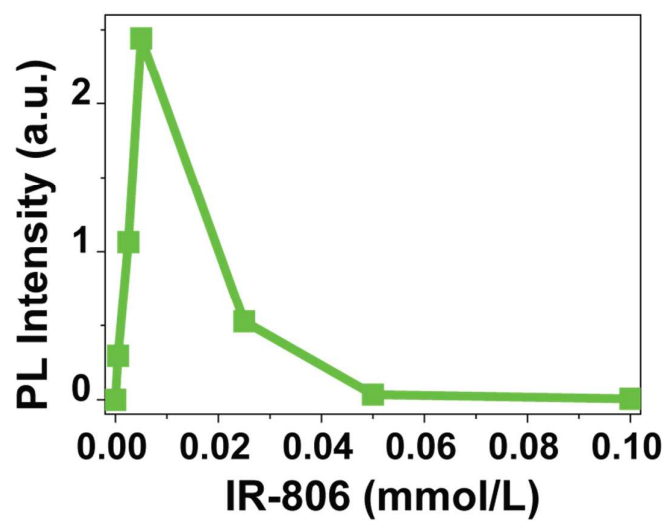

**Figure S8.** Emission intensity integrated in the range 500–700 nm of  $\beta$ -NaYF<sub>4</sub>: 20%Yb, 2%Er NPs (0.1  $\mu$ mol/L) as a function of increasing of IR-806 concentrations (0, 2, 4, 6, 25, 50, 100  $\mu$ mol/L) (excited by 2 W/cm<sup>2</sup> 800 nm, c.w. lasers).

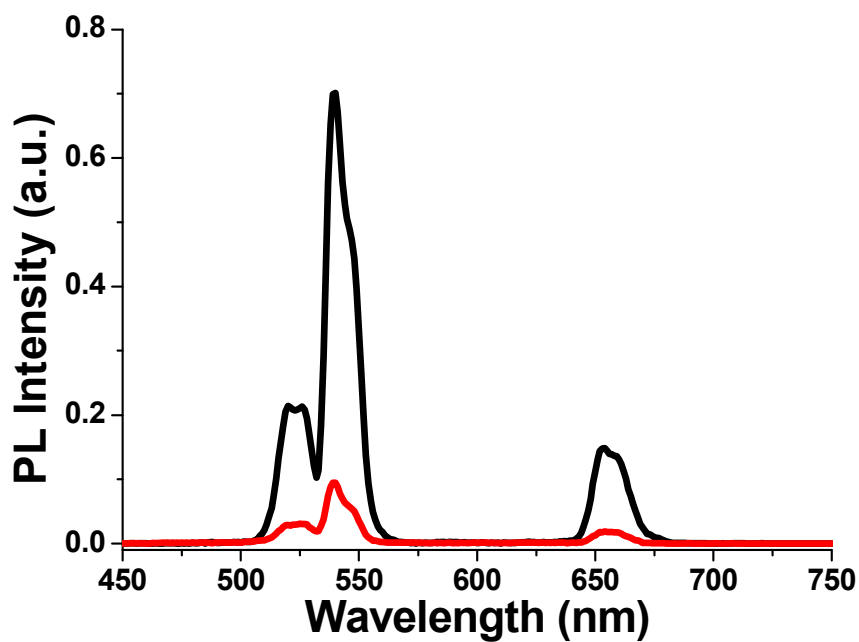

**Figure S9.** Emission spectrum of IR-806 sensitized  $\beta$ -NaYF<sub>4</sub>:20%Yb, 2%Er@NaYF<sub>4</sub>:10%Yb and IR-806 sensitized  $\beta$ -NaYF<sub>4</sub>:30%Yb, 2%Er (red line) UCNPs excited by 2 W/cm<sup>2</sup> 800 nm, c.w. lasers.

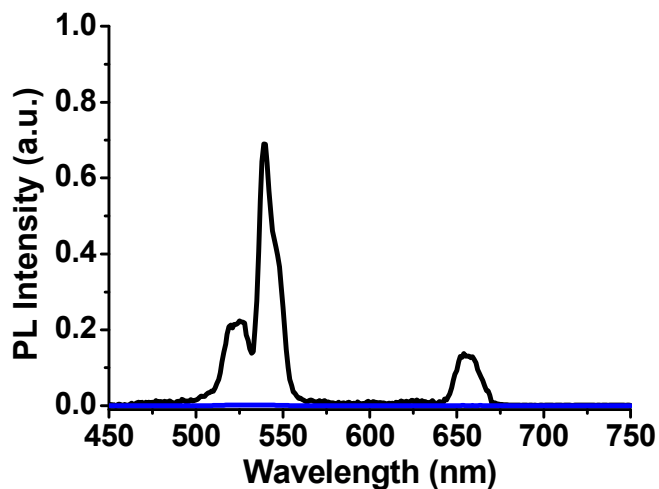

**Figure S10.** The emission spectrum of IR-806-sensitized  $\beta$ -NaYF<sub>4</sub>: 20%Yb, 2%Er@ $\beta$ -NaYF<sub>4</sub>: 10%Yb (black line) and IR-806/ $\beta$ -NaYF<sub>4</sub>: 20%Yb@ $\beta$ -NaYF<sub>4</sub>: 10%Yb (No Er Emitter) (blue line). Both samples were measured under 2 W/cm<sup>2</sup> 800 nm c.w. laser excitation.

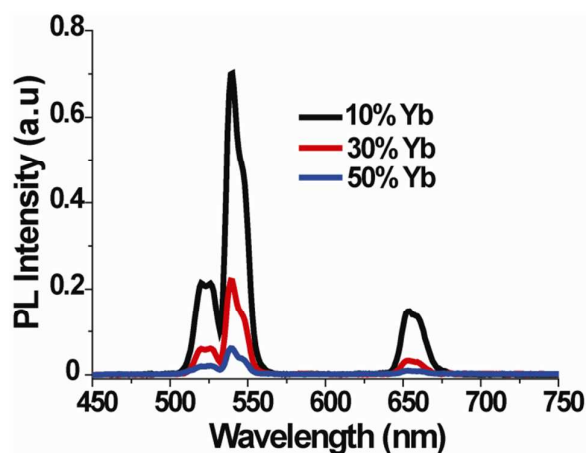

**Figure S11.** The emission spectrum of IR-806-sensitized core/Yb<sup>3+</sup>-shell UCNP with different Yb<sup>3+</sup> doping ratios. All of the samples were under 2 W/cm<sup>2</sup> 800nm continuous wave laser excitation.

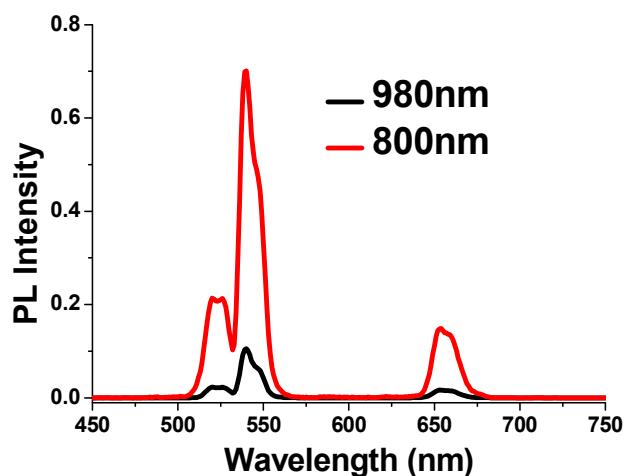

**Figure S12.** The emission spectra of IR-806-sensitized core/Yb<sup>3+</sup>-shell UCNPs under 2 W/cm<sup>2</sup> 800 nm continuous wave laser excitation (red line) and the emission spectra of core/Yb<sup>3+</sup>-shell UCNPs only under 2 W/cm<sup>2</sup> 980 nm continuous wave laser excitation (black line).

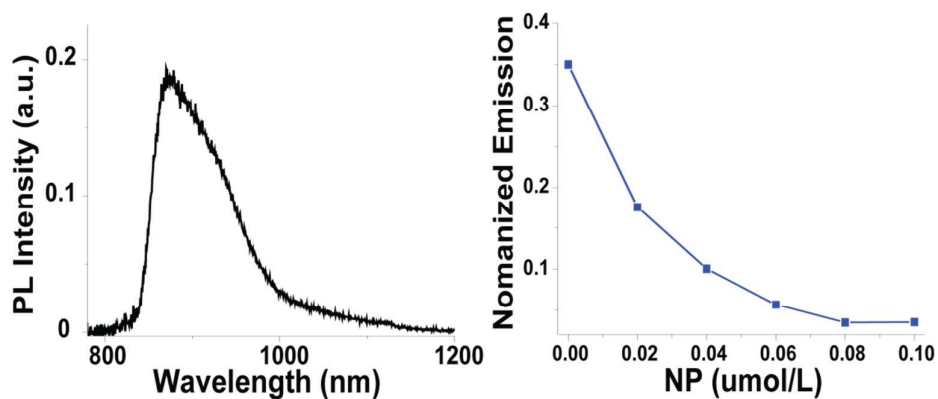

**Figure S13.** Emission spectrum of IR-806 (Final conc: 6 μmol/L in DCM) (left). The right depicts indicate that upon increasing concentration of β-NaYF<sub>4</sub>: 20%Yb, 2%Er@ NaYF<sub>4</sub>:10%Yb by adding NPs volume from 0 ml to 1 ml, (Final conc. 0, 0.02, 0.04, 0.06, 0.08, 0.1 μmol/L) the fluorescence intensity of IR-806 gradually decreased, suggesting the energy transfer occurs from IR-806 dye to the UCNPs. All of the samples were excited at 750 nm.

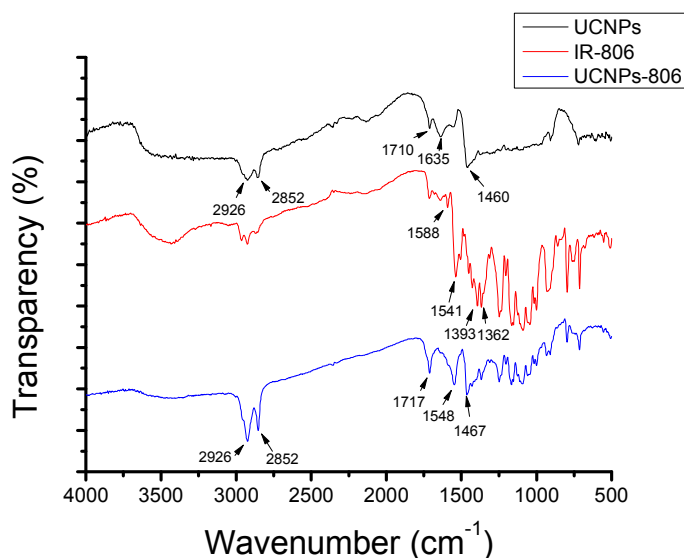

**Figure S14.** FT-IR spectrum of as-synthesized  $\sim 35$  nm  $\beta$ -NaYF<sub>4</sub>:20%Yb,2%Er/ $\beta$ -NaYF<sub>4</sub>, 10%Yb UCNP with OA ligand coating, and IR806 dye and IR dye sensitized  $\beta$ -NaYF<sub>4</sub>:20%Yb,2%Er/ $\beta$ -NaYF<sub>4</sub>, 10%Yb UCNP. The peaks at 1710 and 1635 cm<sup>-1</sup> of as-synthesized UCNP are attributed to the resonance of the carboxyl groups while 2926 and 2852 cm<sup>-1</sup> are attributed to the resonance of unsaturated OA ligands. After the partial ligand replacing by IR-806, the OA unsaturated peaks at 2926 and 2852 cm<sup>-1</sup> remain, however, the peaks belong to carbonyl vibration are shifted to 1717 and 1548 cm<sup>-1</sup>, which clearly show the binding of IR-806 to the UCNP.

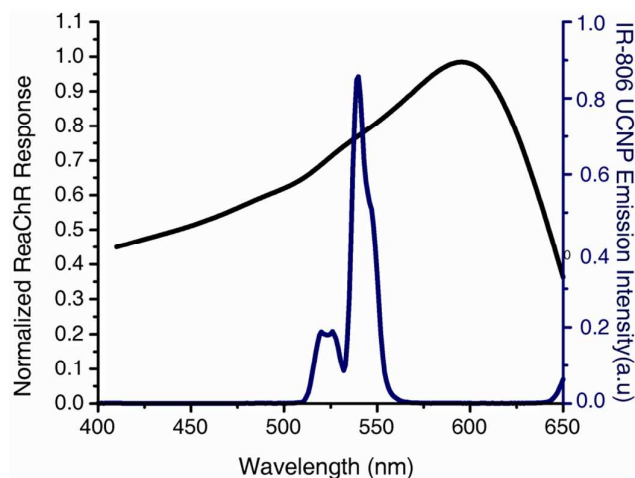

**Figure S15.** Overlaid Spectrum of the ReaChR light response curve (black curve) and an IR-806 dye sensitized  $\beta$ -NaYF<sub>4</sub>:20%Yb,2%Er/ $\beta$ -NaYF<sub>4</sub>, 10%Yb core/Yb<sup>3+</sup>-shell UCNP emission spectra under 800 nm continuous wave laser excitation. (blue curve)

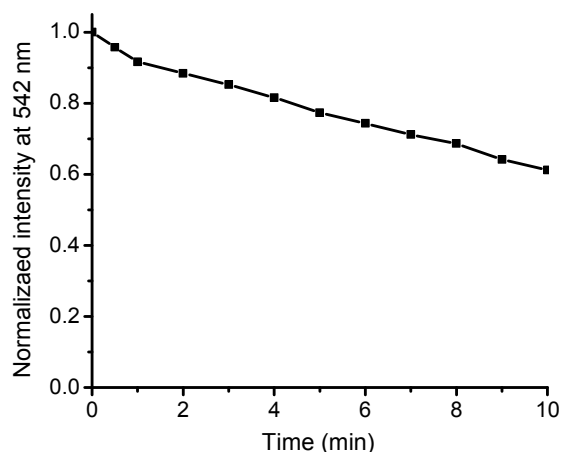

**Figure S16.** The upconversion emission intensity at 542 nm of micelle encapsulated dye-sensitized  $\beta$ -NaYF<sub>4</sub>:20%Yb,2%Er/ $\beta$ -NaYF<sub>4</sub>, 10%Yb core/Yb<sup>3+</sup>-shell UCNPs (0.1  $\mu$ M) under continuous 800 nm CW (2 W/cm<sup>2</sup>) irradiation .

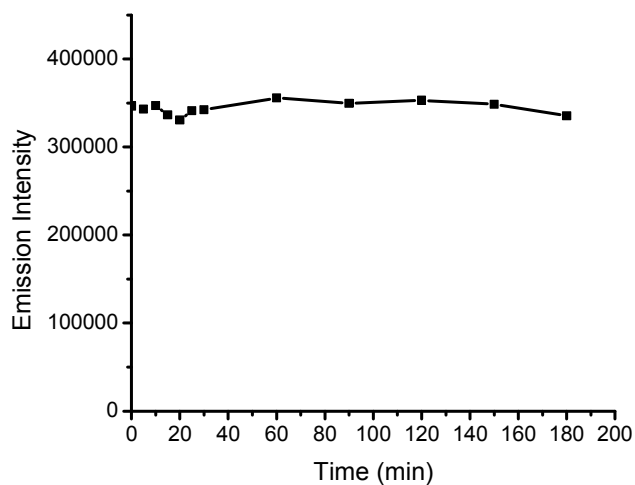

**Figure S17.** The upconversion emission at 542 nm of dye-sensitized  $\beta$ -NaYF<sub>4</sub>:20%Yb,2%Er/ $\beta$ -NaYF<sub>4</sub>, 10%Yb core/Yb<sup>3+</sup>-shell UCNPs PMMA film soaked in PBS over the course of three hours. (2 W/cm<sup>2</sup> 800 nm CW laser).

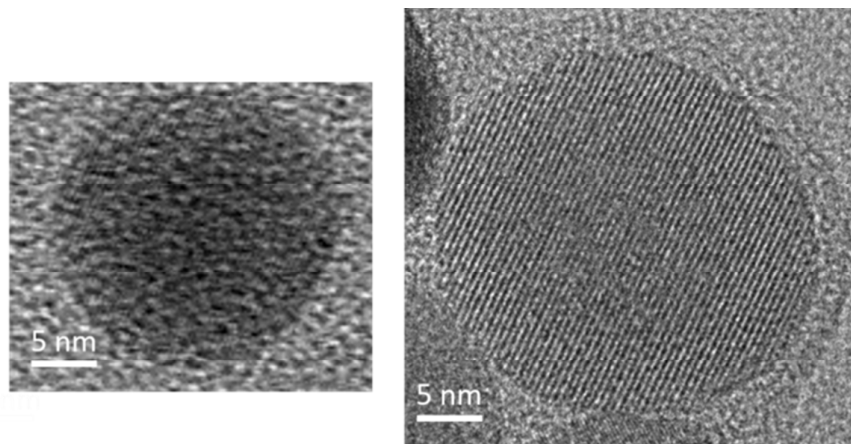

**Figure S18.** HR-TEMs of  $\beta$ -NaYF<sub>4</sub>:20%Yb,2%Er (core, left) and  $\beta$ -NaYF<sub>4</sub>:20%Yb,2%Er@  $\beta$ -NaYF<sub>4</sub>:10%Yb (core/Yb<sup>3+</sup>-shell, right).

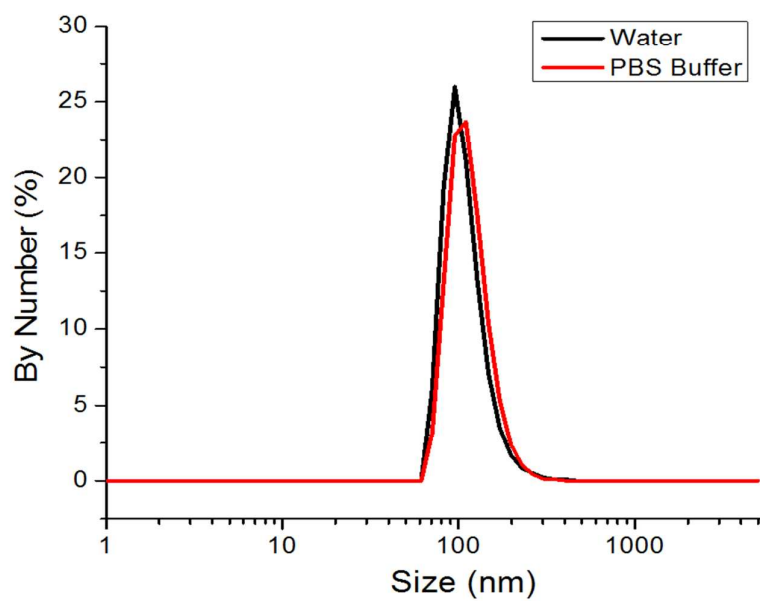

**Figure S19.** DLS data of micelle encapsulated dye-sensitized core/Yb<sup>3+</sup>-shell UCNPs in water (black line) and PBS buffer (red line).

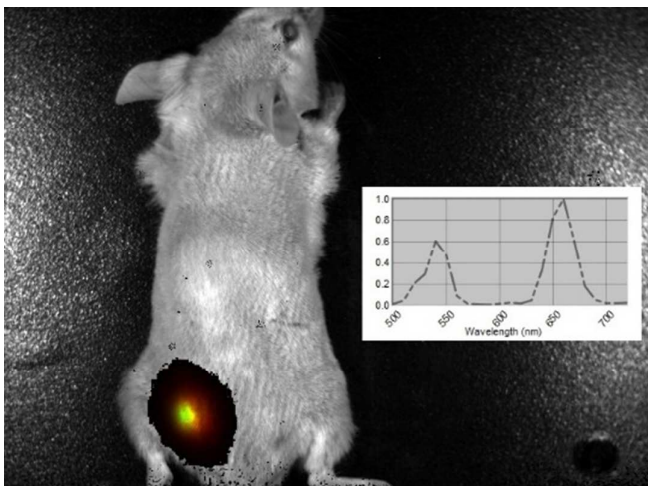

**Figure S20.** Overlaid image of a mouse with a subcutaneous injection of micelle encapsulated dye-sensitized core/Yb<sup>3+</sup>-shell  $\beta$ -NaYF<sub>4</sub>:20%Yb,2%Er@ $\beta$ -NaYF<sub>4</sub>:10%Yb UCNPs (50  $\mu$ L, concentration 10 mg/mL), excitation wavelength 800 nm CW laser (1.0 W/cm<sup>2</sup>), and corresponding *in vivo* emission spectrum is in the inset.
